# Supplementary material
Source: PubMed Central journal article supplement (PMC3741651)
Supplement: NIHMS438792-supplement-01.pdf [file NIHMS438792-supplement-01.pdf]

**Supplemental Table 1** Multivariable Hazard Ratios (HR) and 95% Confidence Intervals (CI) for Incident Cardiovascular Events (Excluding Coronary Revascularization) Associated with Presence of Minor Isolated Q Waves Stratified by Race/Ethnicity

|          | Model 1*<br>HR (95% CI) | Model 2†<br>HR (95% CI) |
|----------|-------------------------|-------------------------|
| White    | 0.73 (0.36-1.49)        | 0.71 (0.34-1.45)        |
| Black    | 1.55 (0.78-3.11)        | 1.44 (0.70-2.94)        |
| Hispanic | 2.51 (1.35-4.67)        | 2.50 (1.33-4.70)        |

The Chinese group was excluded from multivariable analysis because of its small number of events.

\*Model 1: Demographic variables (age and sex), socioeconomic status (education and income) and cardiovascular disease risk factors (body mass index, total cholesterol, lipid-lowering drugs, smoking status, systolic blood pressure, blood pressure lowering drugs, diabetes).

†Model 2: Variables in Model 1 plus other ECG abnormalities (abnormal QRS axis, ST/T abnormalities, left ventricular hypertrophy, and intraventricular conduction defects).
